# Supplementary material
Source: publisher figshare collection journal article supplement (https://karger.figshare.com/articles/dataset/_/5121193)
Supplement: Supplementary file 1 [file 1]

**Suppl. Table 1.** Primers and BAC clones used for 8S probe production

| Probe         | PCR product | PCR product length (bp) | Primers 5'-3' Forward, Reverse                                   | PCR template | BAC clone accession no. |
|---------------|-------------|-------------------------|------------------------------------------------------------------|--------------|-------------------------|
| BAC 8S<br>(1) | 5.1-2       | 1780                    | CCT CCT GAA CCG ATC CAA TA<br>ACT TCG GTT GTT TGT TTA TAC AT     | BAC<br>DNA   | AC192353                |
|               | 5.2-1       | 1142                    | ATG CGA TAT CCA GCT CTT GAT<br>AAA TGA TCT CTT AAA CTT ACC TGC   |              |                         |
|               | 5.2-2       | 1081                    | TGA CTT ACT CTG AAC TGT GGG AAG<br>TTG CAG GAC TAT GGA TGG GTT A |              |                         |
| BAC 8S<br>(2) | 6.1-1       | 2404                    | CCG TTC CAG TTC CAG CA<br>ACT GCA TCG GTA TCA AAA ACA G          | BAC<br>DNA   | AC200099                |
|               | 6.5-1       | 1489                    | CGG CTC ACC TCC CAG TCA AA<br>CCC GCT CGT GCT GCT TC             |              |                         |

**Suppl. Table 2.** Accession numbers for maize lines in suppl. figure 1, alphabetically by line

| Line   | Accession  | Line       | Accession  | Line        | Accession  |
|--------|------------|------------|------------|-------------|------------|
| A239   | Ames 23405 | A554       | PI 587138  | A556        | Ames 23450 |
| A619   | PI 587139  | A634       | Ames 19308 | A635        | Ames 19309 |
| A641   | Ames 19311 | A654       | PI 587141  | A665        | PI 607525  |
| A679   | PI 587142  | A680       | Ames 23503 | A682        | PI 587143  |
| B77    | PI 608765  | B79        | PI 608766  | B84         | PI 608767  |
| B103   | PI 594046  | B104       | PI 594047  | B105        | PI 594048  |
| B109   | PI 597927  | C123       | Ames 19313 | CI31A       | Ames 21512 |
| CI64   | Ames 19314 | CI66       | PI 587148  | CM174       | Ames 19316 |
| CML9   | PI 595530  | CML38      | PI 595534  | CML254      | PI 595542  |
| CML264 | PI 595544  | CML287     | PI 595565  | DE2         | PI 606330  |
| GA209  | Ames 10248 | H49        | Ames 15929 | H95         | Ames 19319 |
| H100   | Ames 22748 | IDS69      | Ames 24576 | Mangelsdorf | -          |
| Mo24W  | PI 587144  | MS153      | Ames 24734 | MS1334      | Ames 24752 |
| Mt42   | Ames 20140 | N28        | Ames 19321 | Pa91        | PI 587147  |
| R168   | Ames 19326 | R229       | PI 592734  | RWS BC5     | -          |
| SD40   | PI 606768  | Tama Flint | PI 217411  | Va17        | Ames 19002 |
| Va22   | Ames 19328 | Va26       | PI 587149  | Va35        | PI 587150  |
| Va99   | Ames 24989 | Va102      | PI 587151  | W64A        | PI 587152  |
| W117   | PI 587153  | W117HT     | PI 587154  | W153R       | PI 587154  |
| W182B  | Ames 19330 | Wf9        | Ames 19293 | -           | -          |
