# Supplementary material
Source: publisher figshare collection journal article supplement (https://karger.figshare.com/articles/dataset/_/5121193)

**Suppl. Fig. 1.** Karyotypes of other maize lines. All procedures were done as described in Materials and Methods.

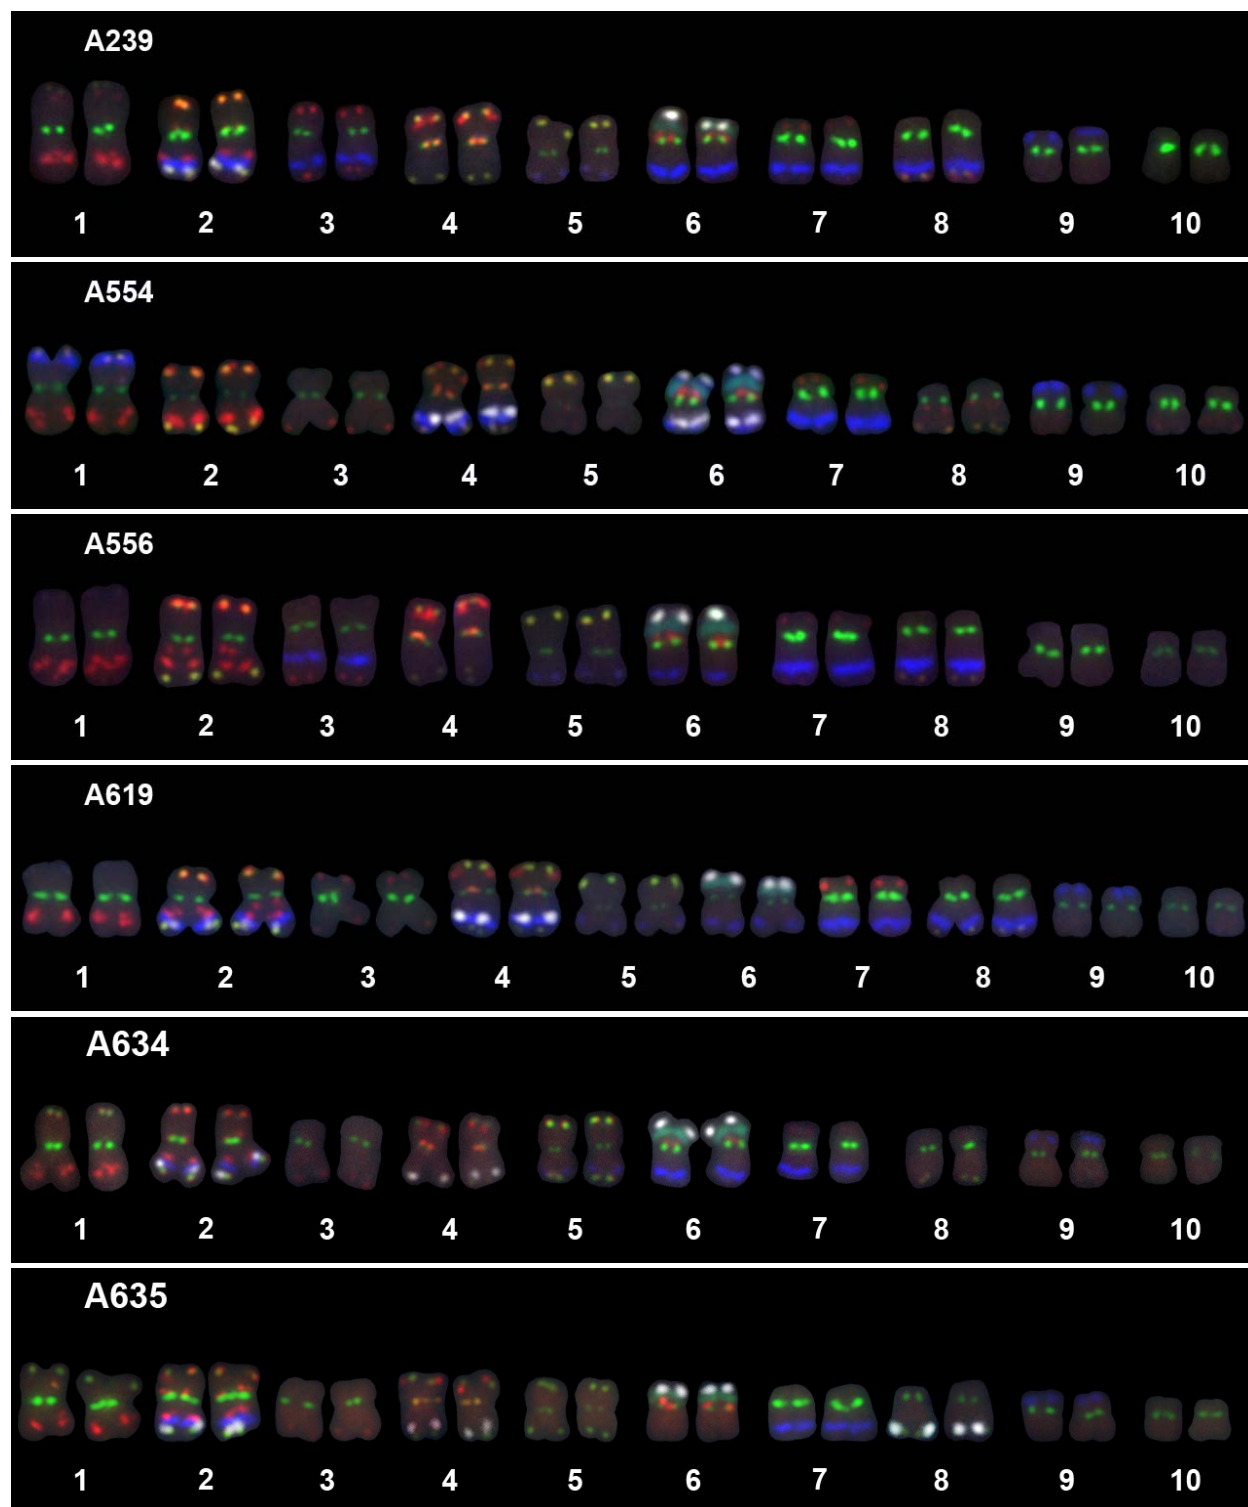

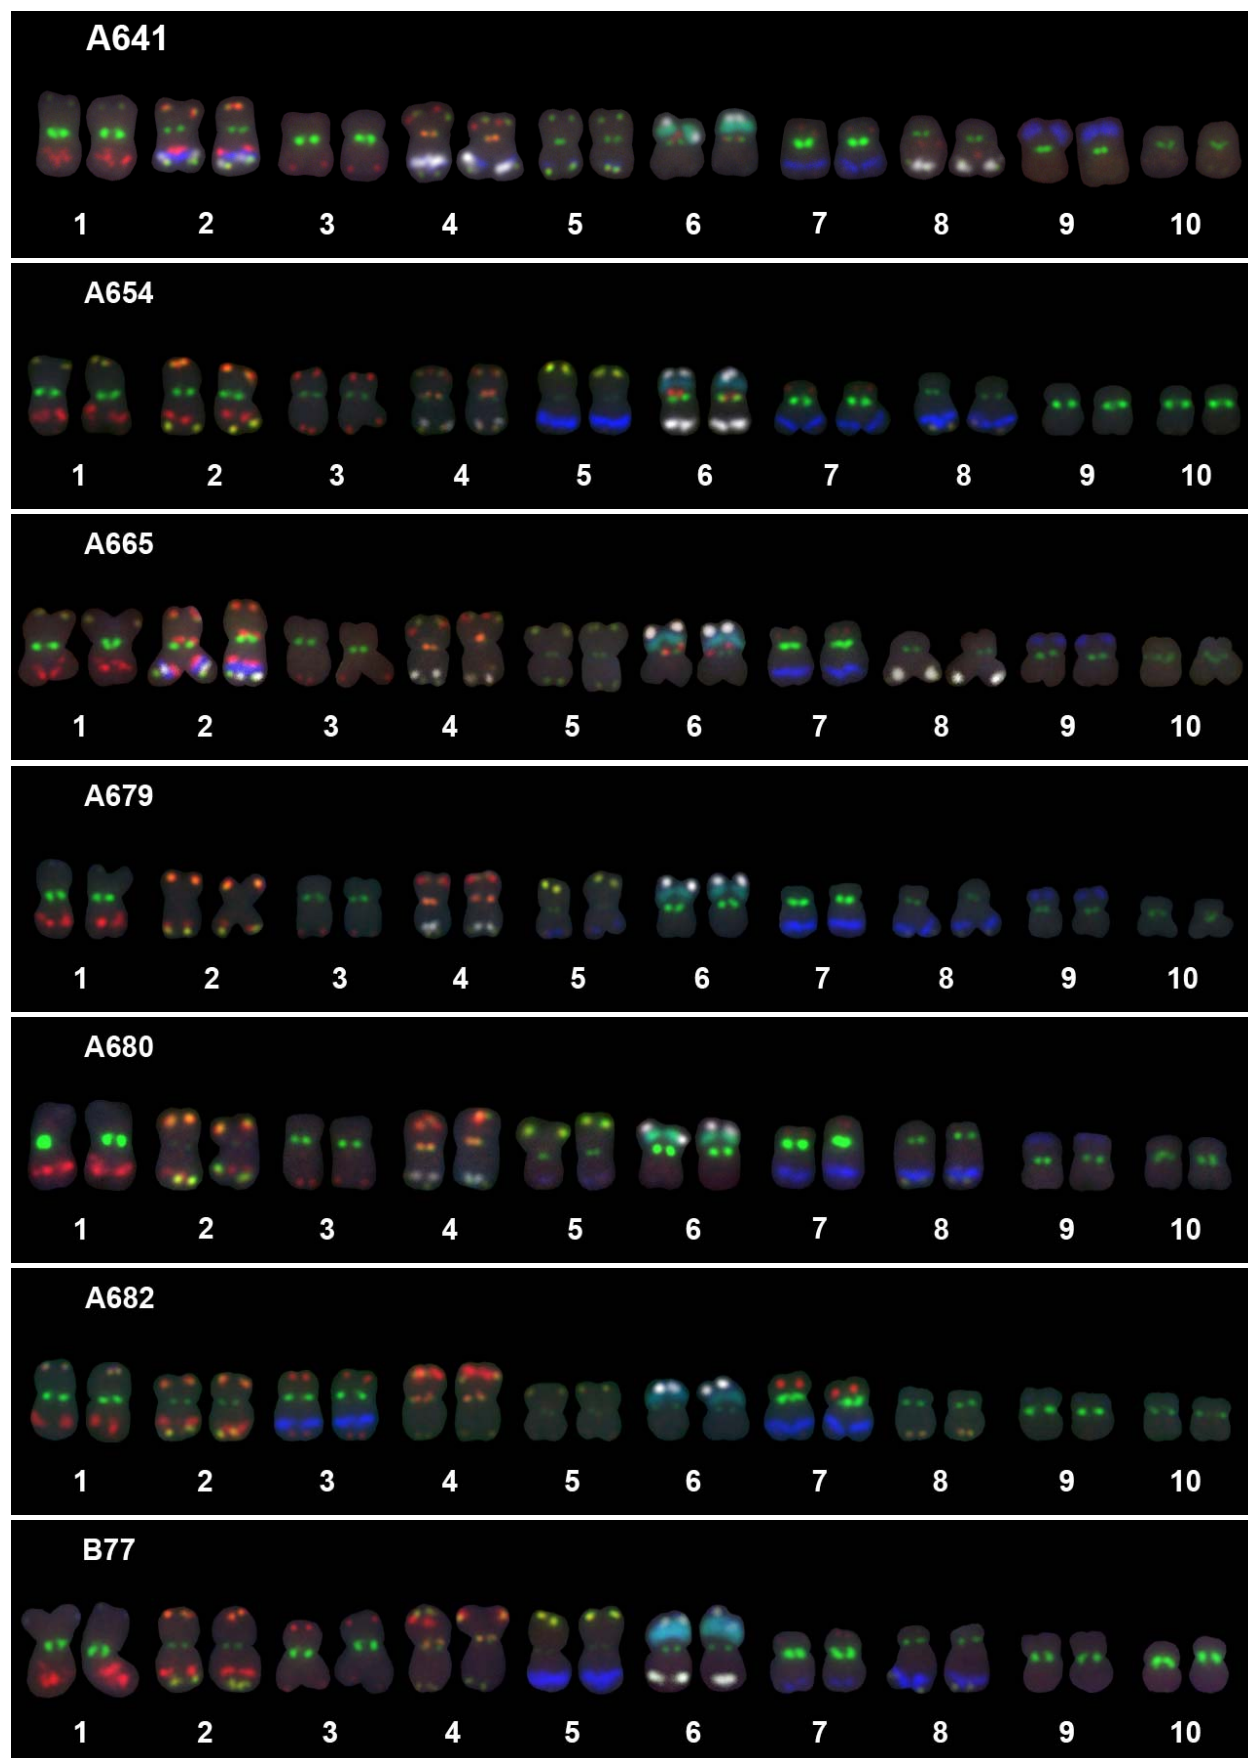

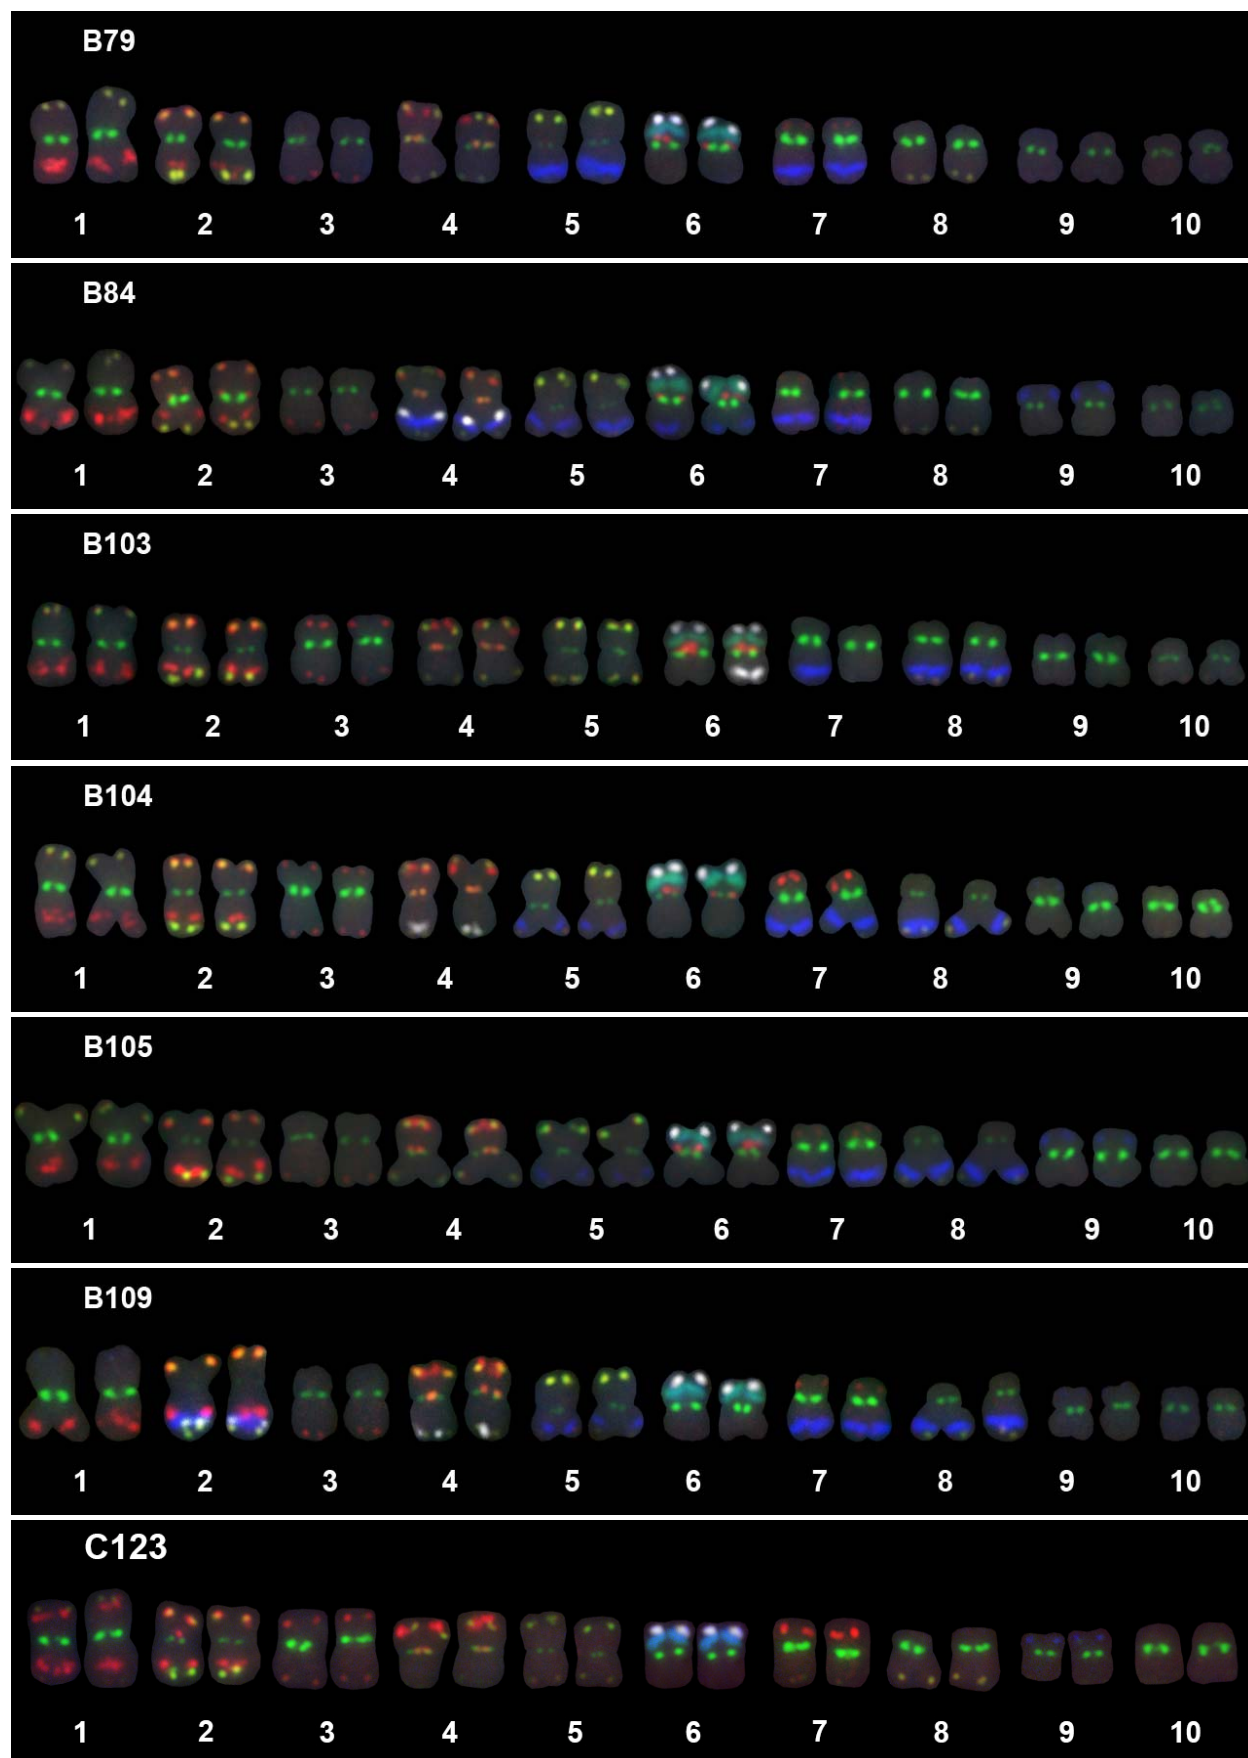

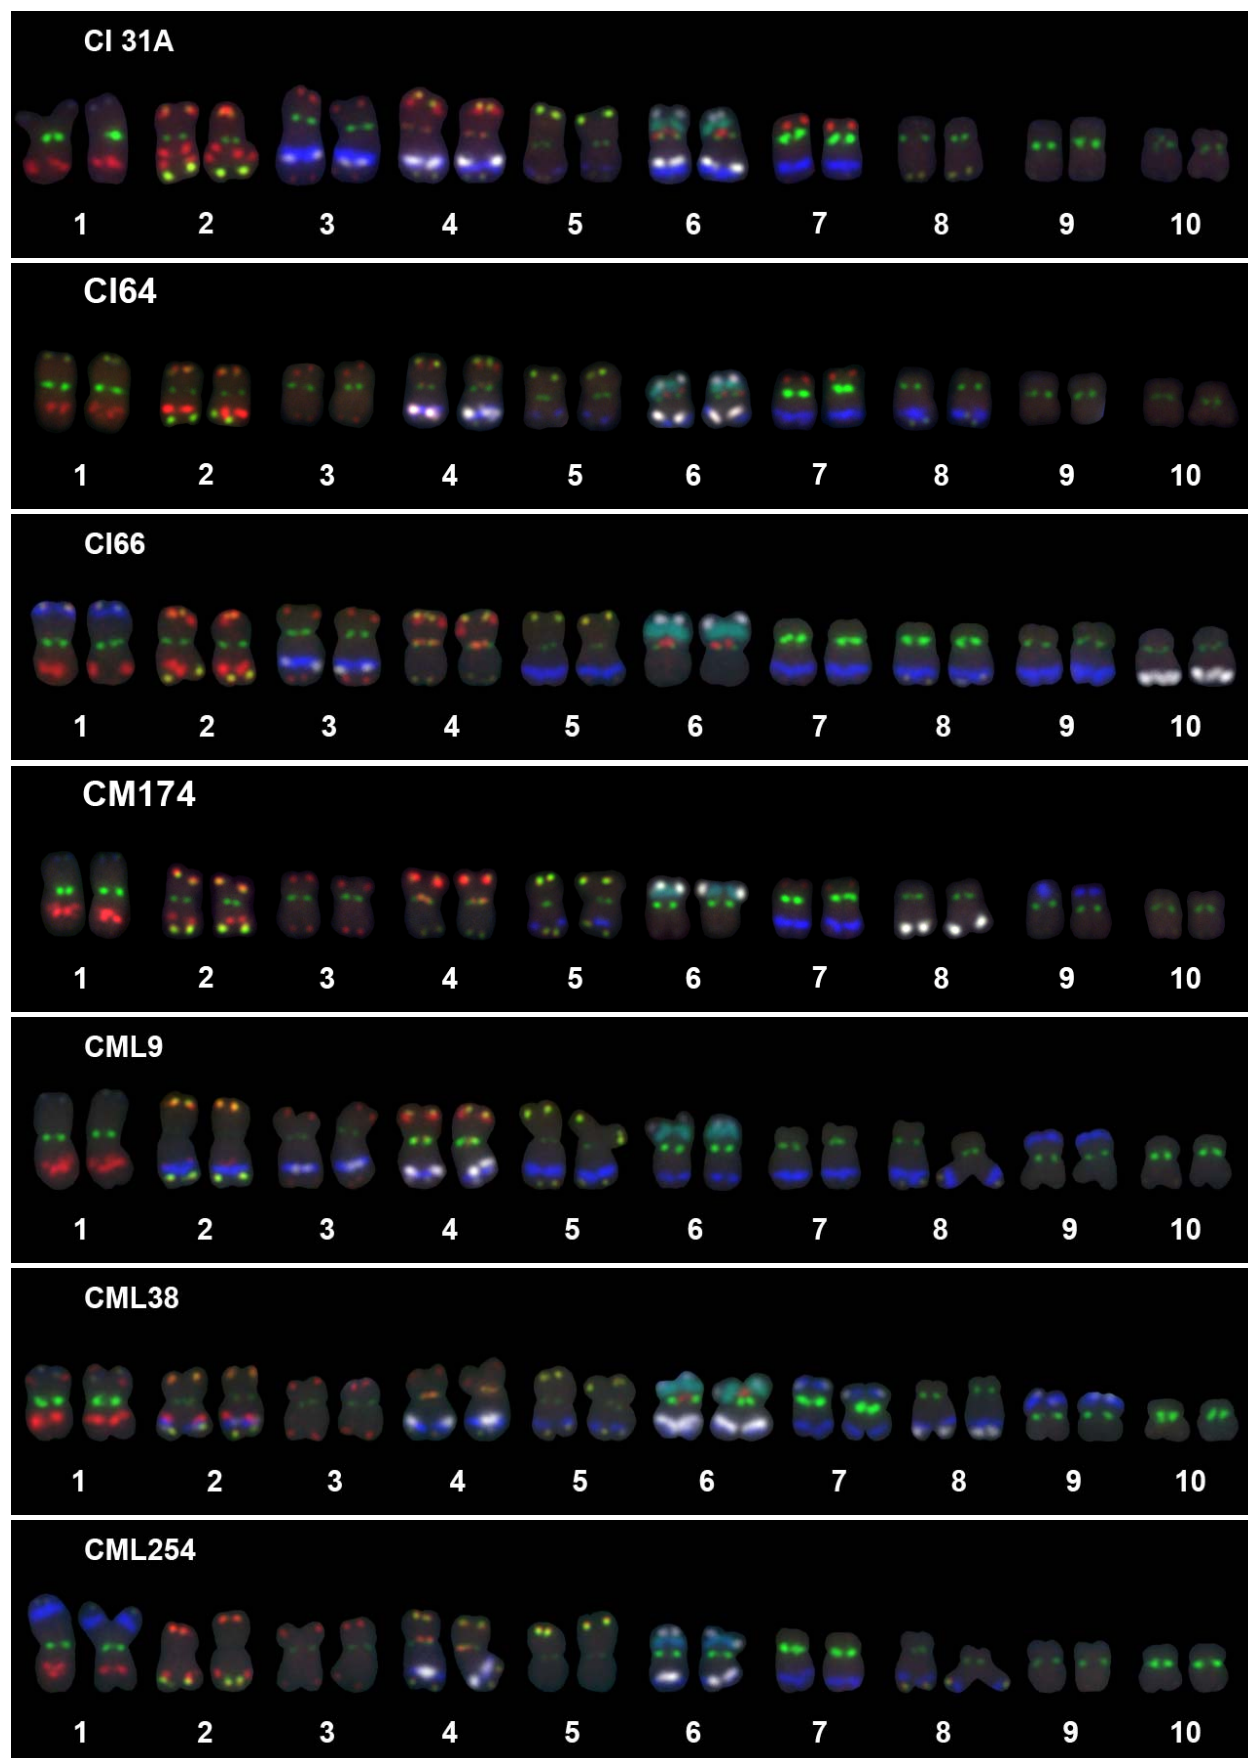

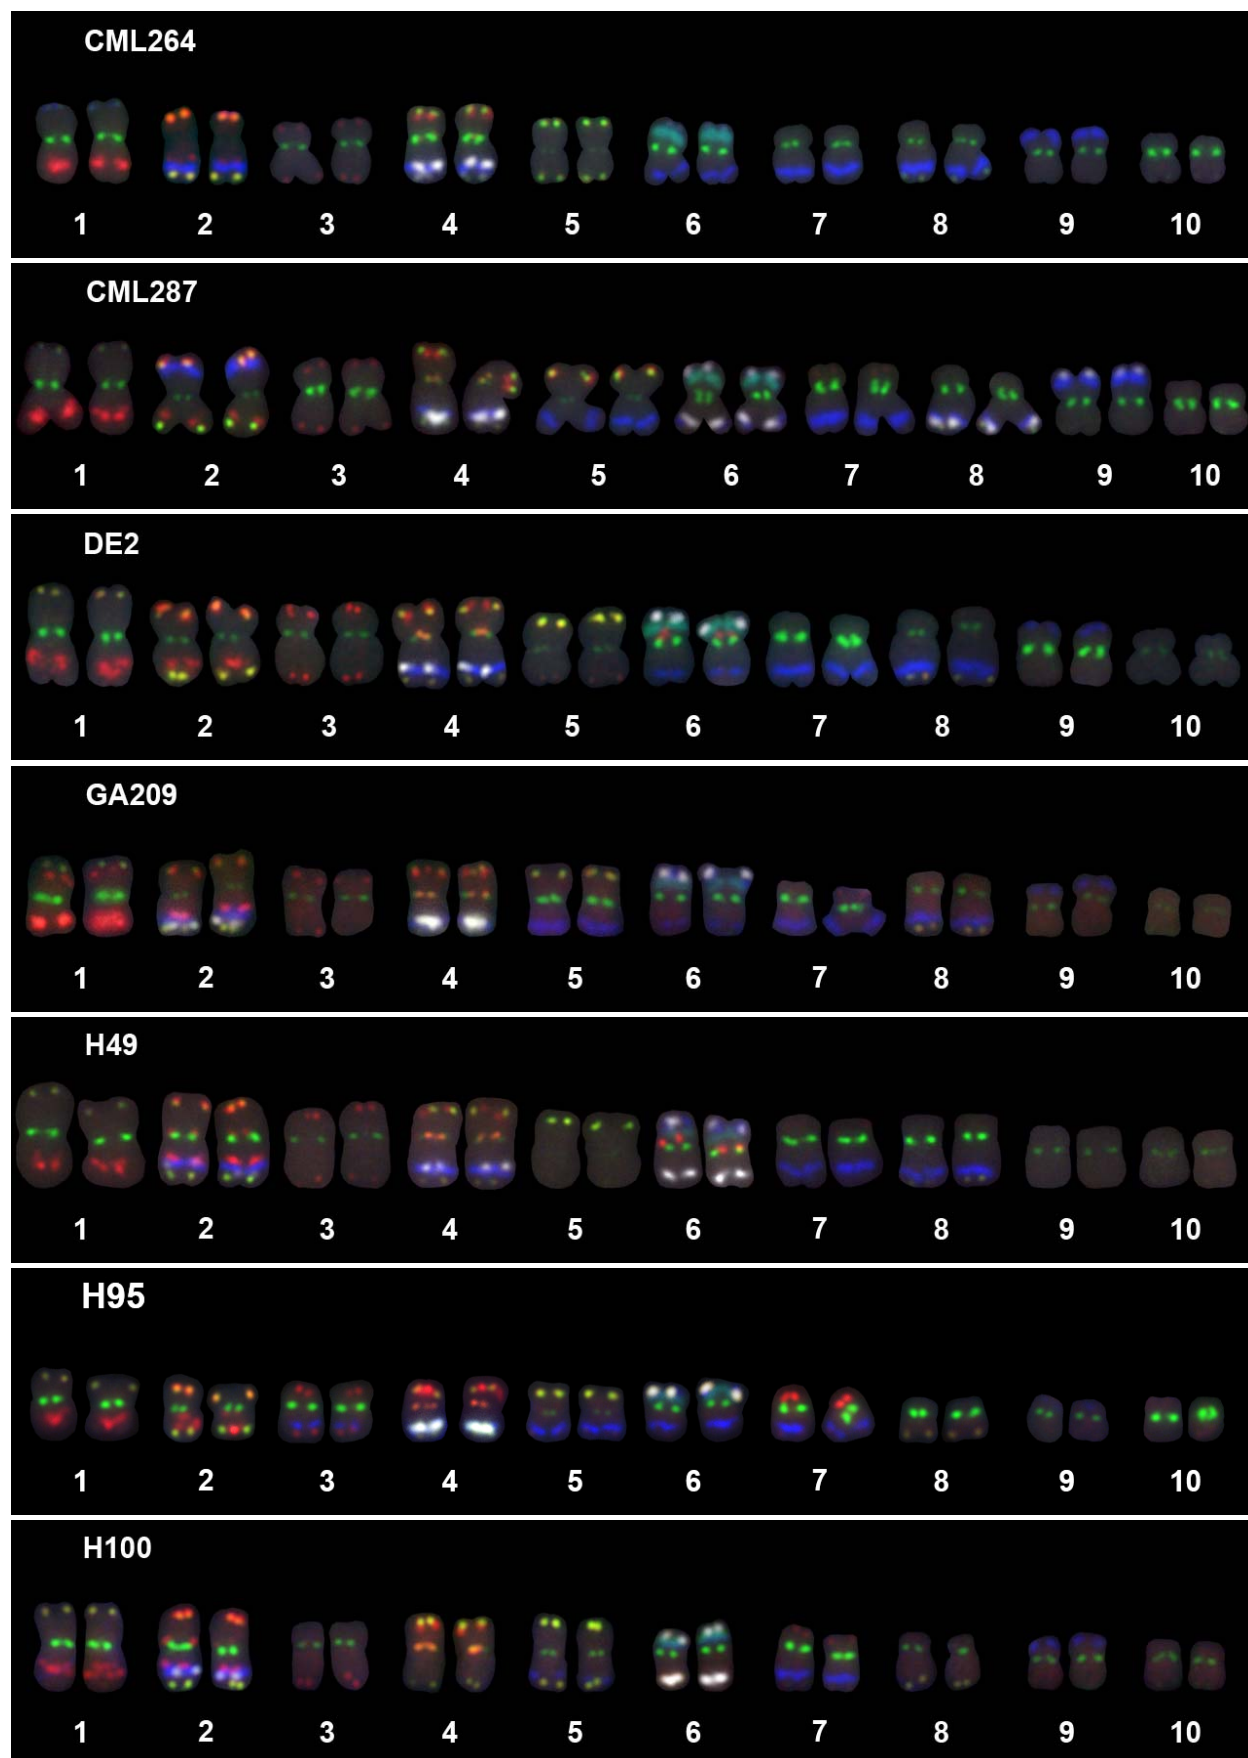



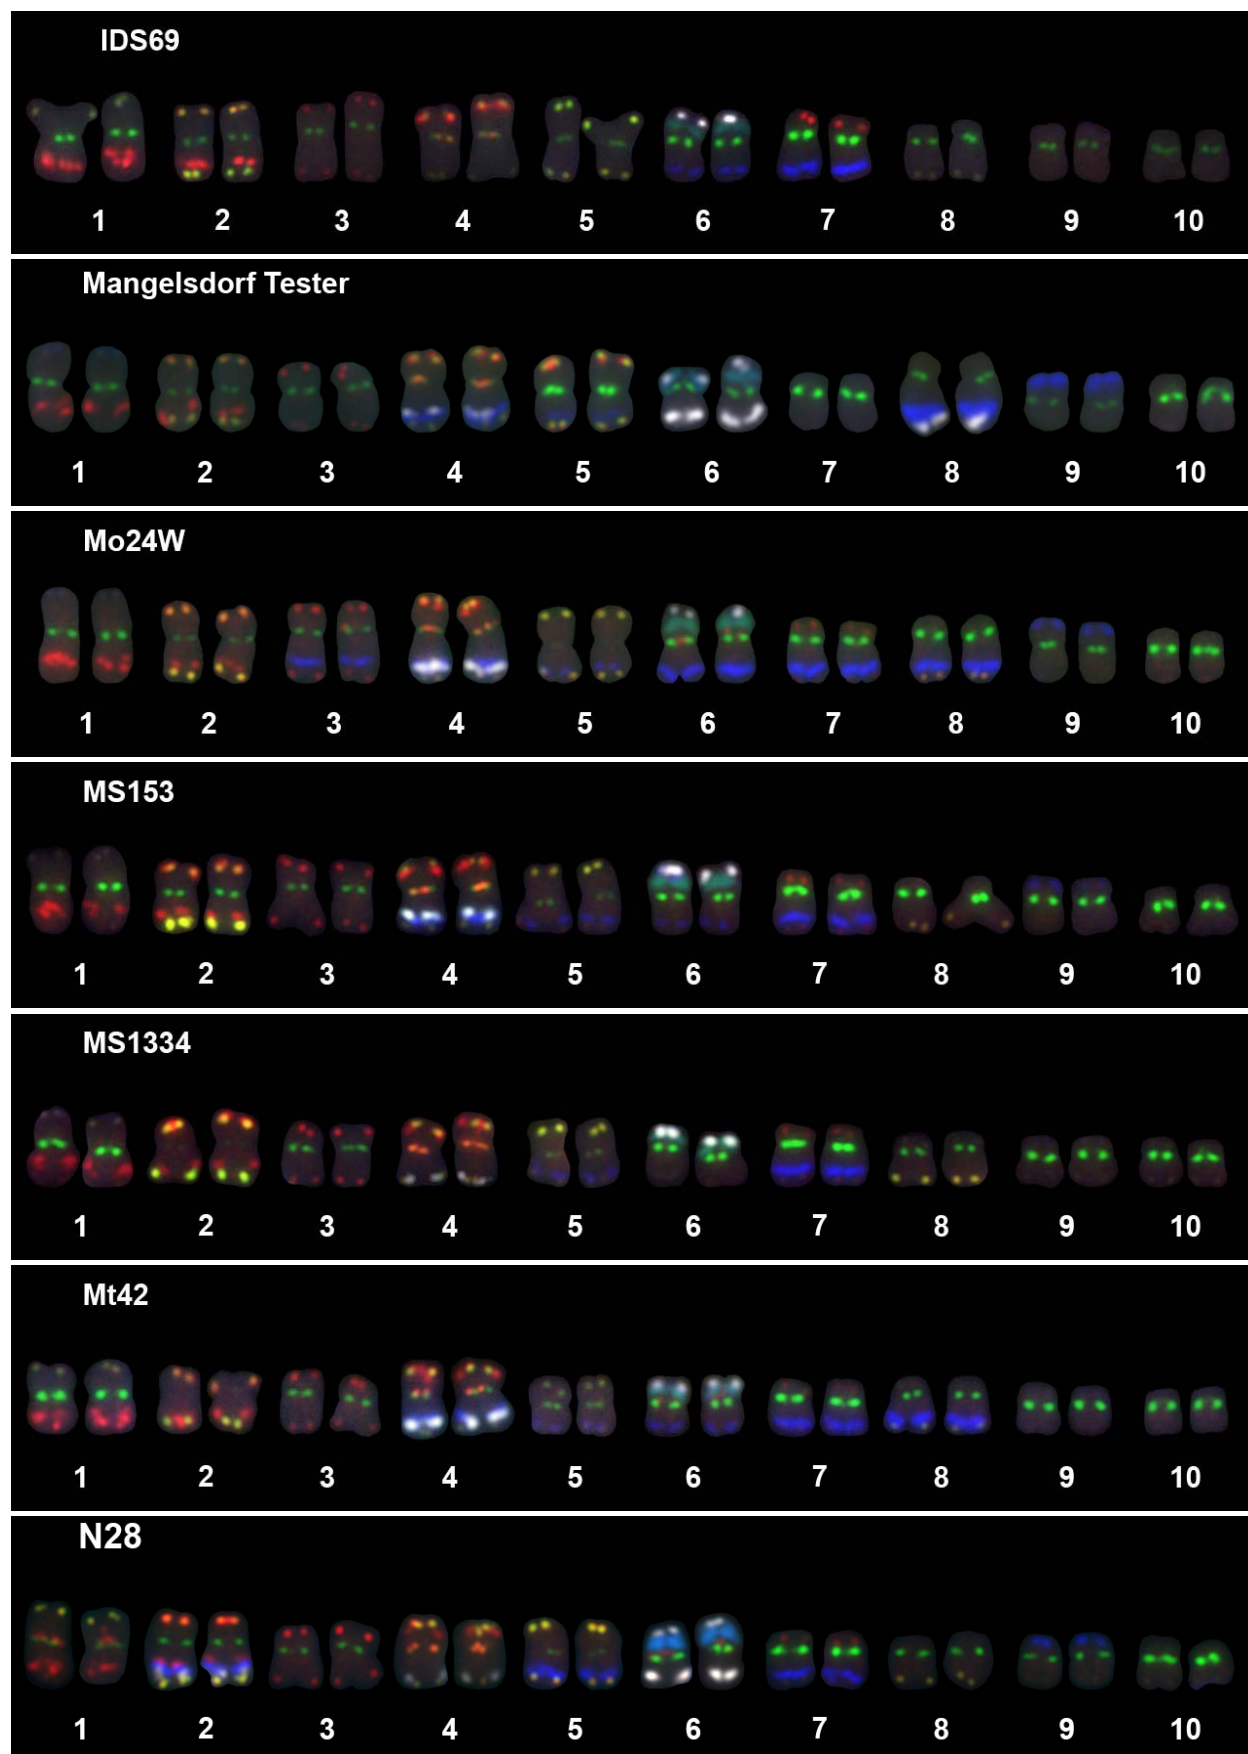

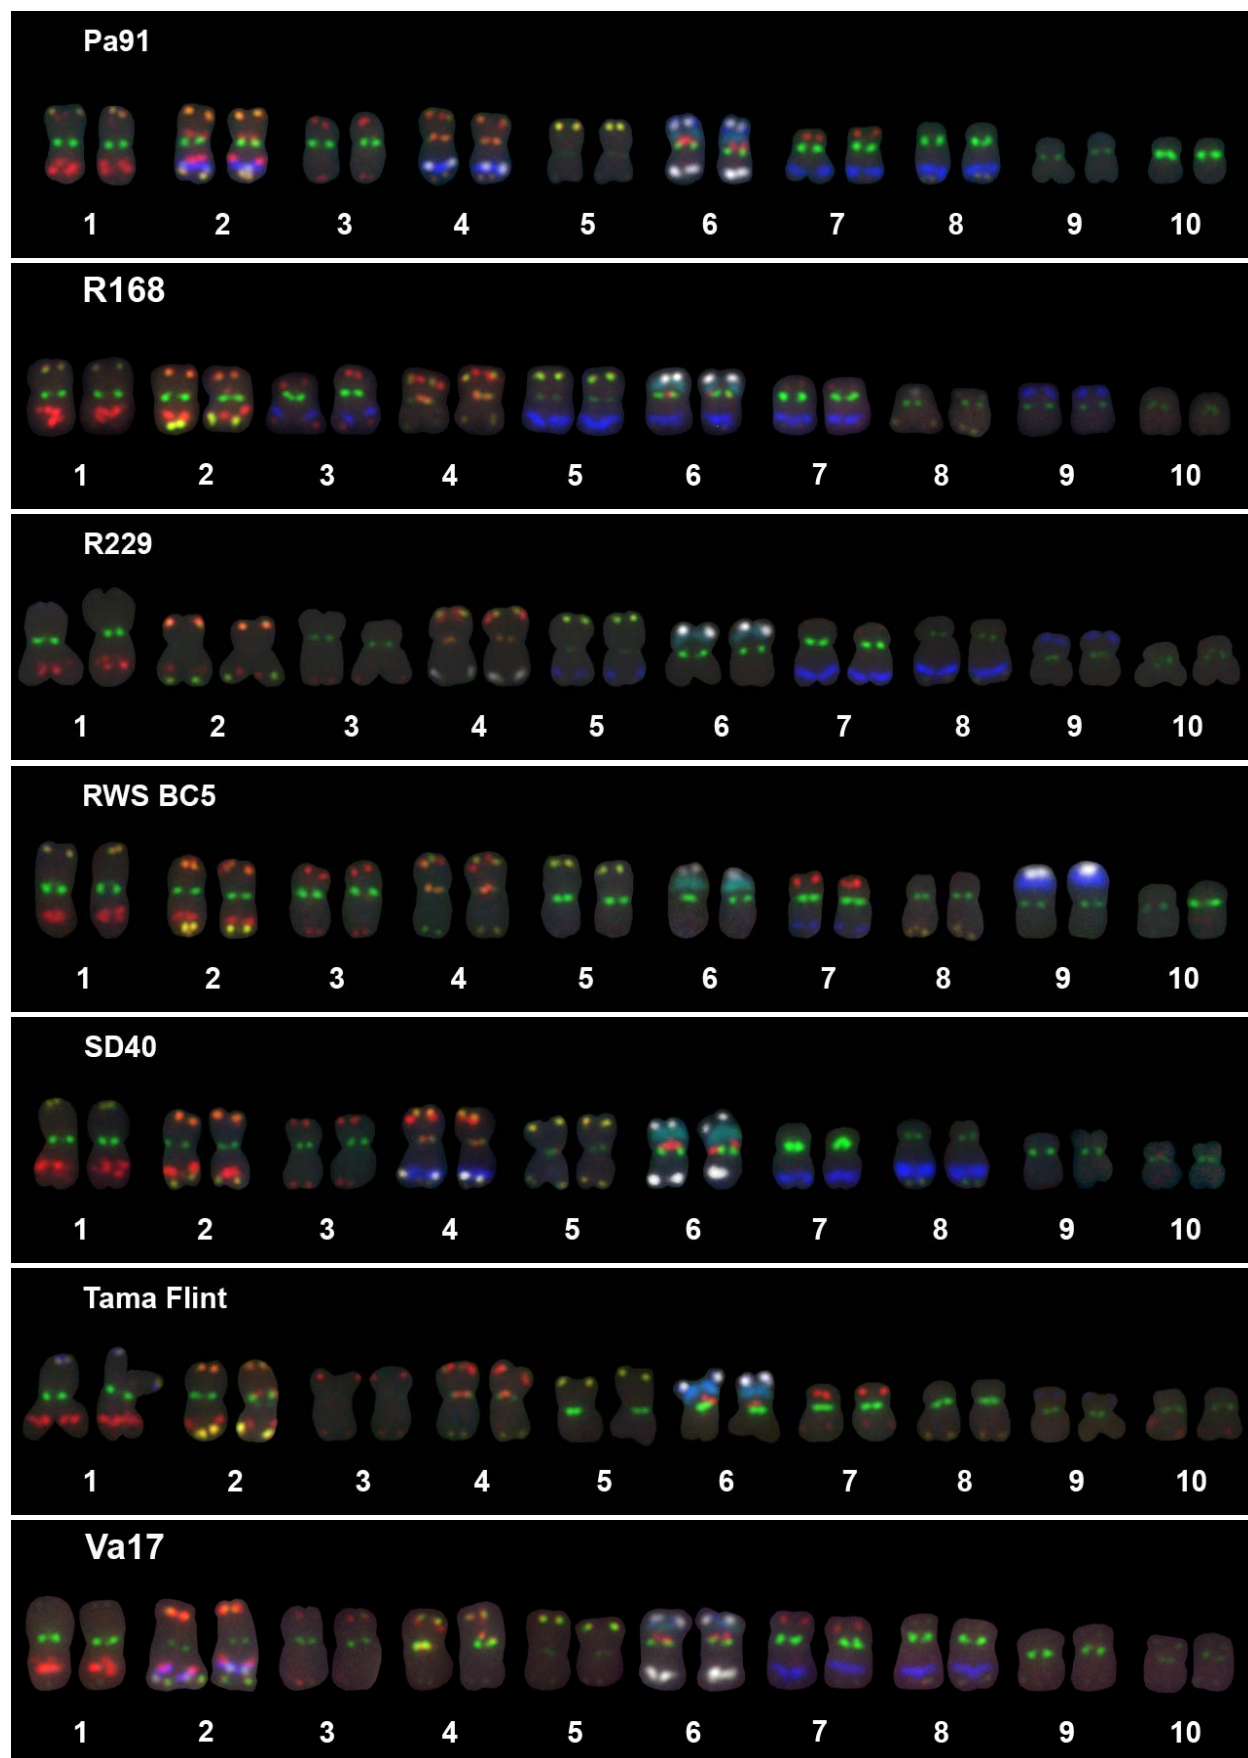

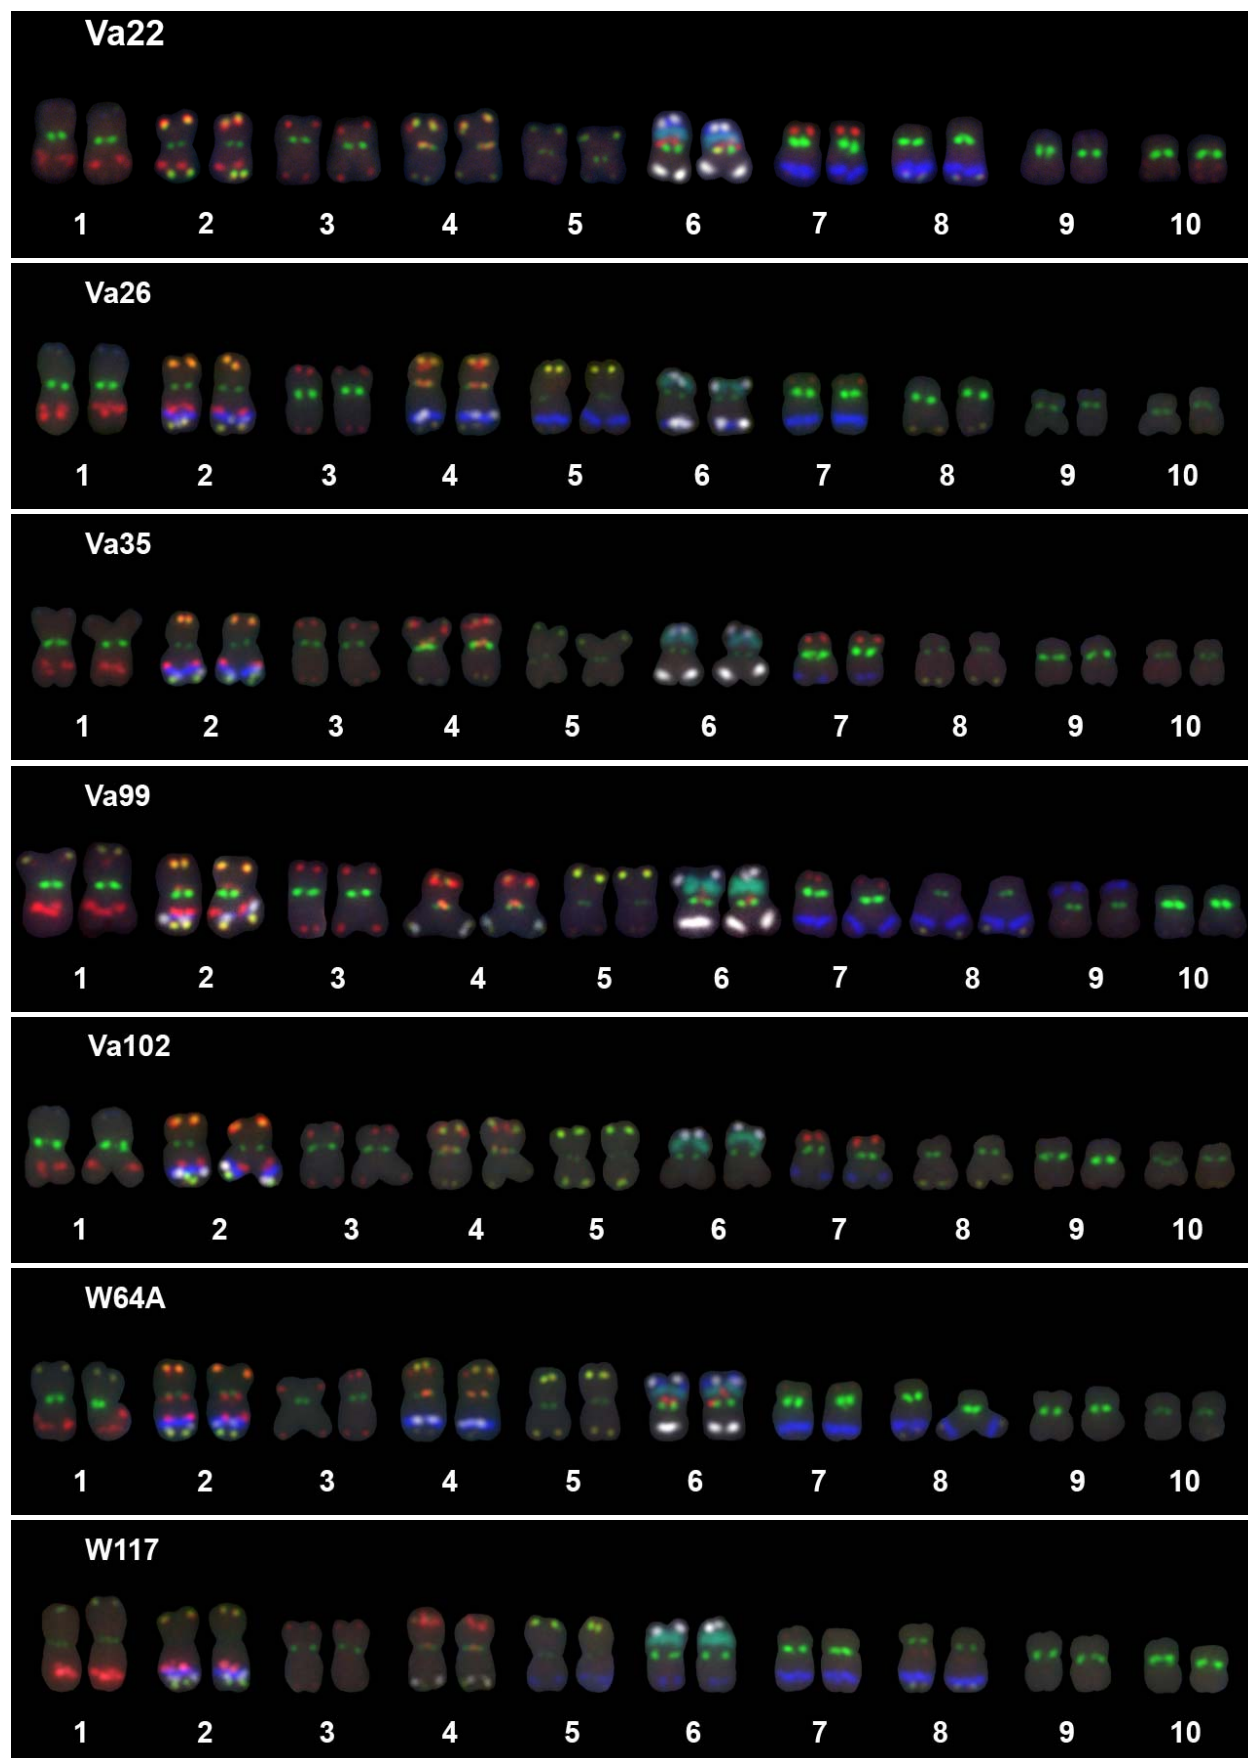



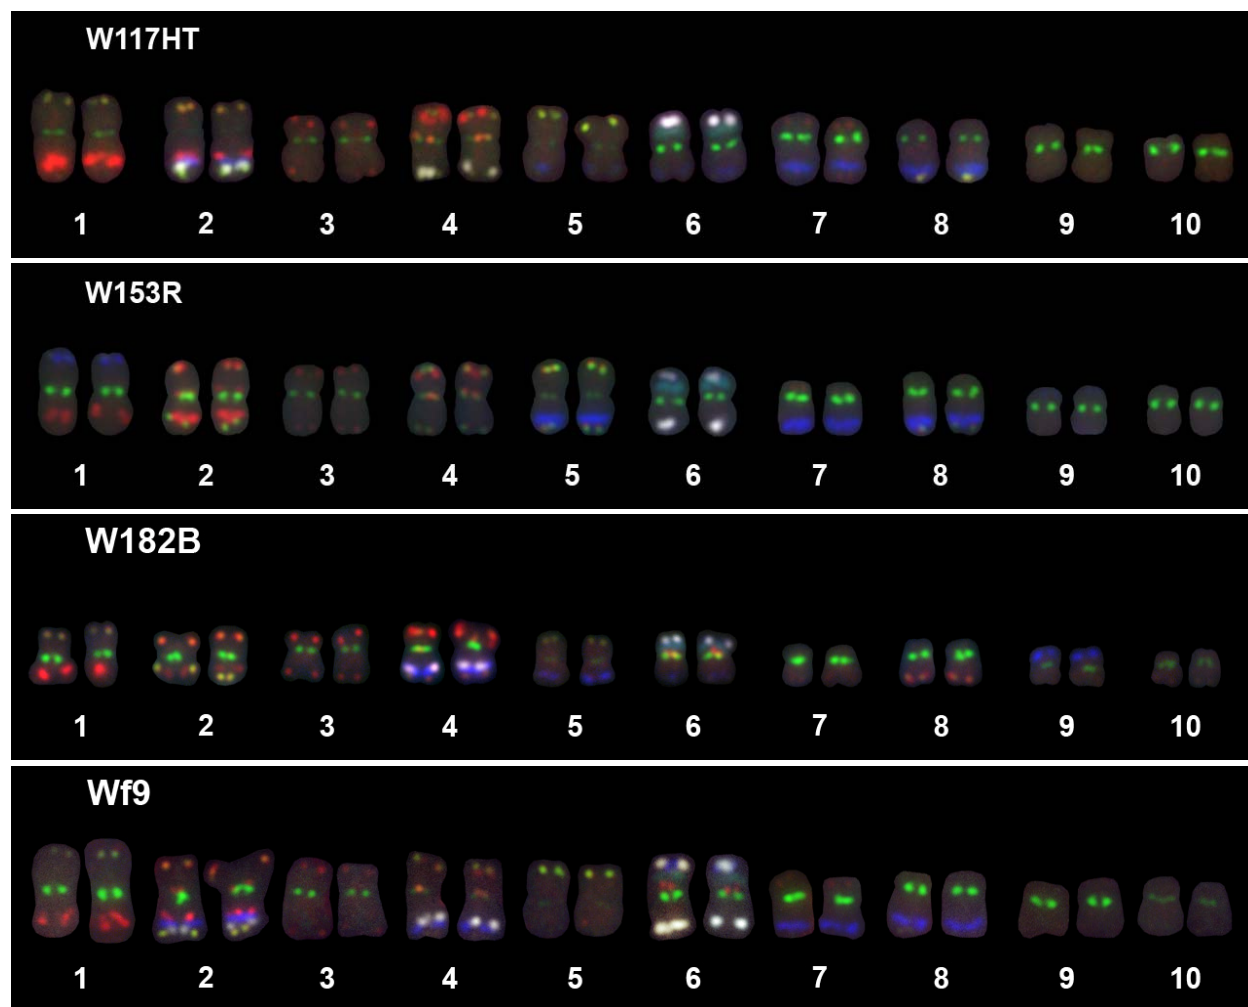

Supplement: Supplementary file 2 [file 1]
